# Supplementary material for: Trends in female-selective abortion among Asian diasporas in the United States, United Kingdom, Canada and Australia
Source: eLife. 2022 Sep 27;11:e79853. doi: 10.7554/eLife.79853 (PMC9514843; doi:10.7554/eLife.79853)
Supplement: Supplementary file 1. — (A) Births and conditional sex ratios (CSRs) from Australia Census 2001, 2006, 2011, 2016. (B) Births and CSRs from Canada Census 2001, 2016. (C) Births and CSRs from UK Census 2001, 2011. (D )Births and CSRs from US Census and American Community Survey (ACS). (E) Births and CSRs for domestic population. [file elife-79853-supp1.xlsx]

## Sheet: Supplementary file 1A
			Births and CSRs from Australia Census 2001,2006, 2011, 2016
			Mother's ethnicity/ancestry		Indian			Chinese			Korean			Pakistani			Sri Lankan			Bangladeshi		Hong Kong (Chinese)
	Country (Year)		Birth order and sex of previous child	Male	Female	Sex Ratio	Male	Female	Sex Ratio	Male	Female	Sex Ratio	Male	Female	Sex Ratio	Male	Female	Sex Ratio	Male	Female	Sex Ratio	Male	Female	Sex Ratio
		Mother's country of birth			India			China			Korea			Pakistan			Sri Lanka			Bangladesh			Hong Kong
			First born	3219	3130	972.352	6582	6243	948.496	1139	1067	936.787	422	380	900.474	2132	2101	985.46	294	288	979.592	2019	1923	952.452
			Second born, one earlier son	1215	1246	1025.51	2022	1884	931.751	392	348	887.755	175	167	954.286	805	804	998.758	108	121	1120.37	733	603	822.647
			Second born, one earlier daughter	1267	1129	891.081	2017	1889	936.539	362	335	925.414	145	154	1062.07	804	797	991.294	131	122	931.298	649	651	1003.08
			Third born, two earlier sons	98	119	1214.29	183	132	721.311	37	34		35	41		96	87	906.25	13	9		71	62	873.239
			Third born, two earlier daughters	155	116	748.387	214	181	845.794	36	46		45	41		97	85	876.289	16	16		82	83	1012.2
			Third born, one earlier son and daughter	190	205	1078.95	255	208	815.686	50	67	1340	76	70	921.053	113	132	1168.14	40	23		91	85	934.066
	Australia		All births	6201	6003	968.07	11349	10597	933.739	2035	1916	941.523	937	893	953.042	4073	4032	989.934	605	588	971.901	3682	3426	930.473
	2001	Mother's country of birth			Australia
			First born	582	526	903.78	2266	2231	984.554	9	14		43	42		240	240	1000	9	0
			Second born, one earlier son	166	166	1000	754	670	888.594	6	0		14	4		75	65	866.667	3	0
			Second born, one earlier daughter	147	138	938.776	700	665	950	3	3		12	12		64	72	1125	0	0
			Third born, two earlier sons	25	24		133	121	909.774	0	0		3	3		20	14		0	0
			Third born, two earlier daughters	23	22		130	105	807.692	0	0		0	3		15	6		0	0
			Third born, one earlier son and daughter	45	37		176	188	1068.18	0	0		0	4		20	15		0	0
			All births	1018	933	916.503	4223	4064	962.349	18	17		78	68	871.795	440	418	950	12	0
		Mother's country of birth			India			China			Korea			Pakistan			Sri Lanka			Bangladesh			Hong Kong
			First born	4428	4297	970.416	8565	8133	949.562	1528	1492	976.44	706	633	896.601	2516	2347	932.83	560	525	937.5	2090	1922	919.617
			Second born, one earlier son	1507	1483	984.074	2550	2335	915.686	470	461	980.851	283	252	890.459	879	891	1013.65	217	196	903.226	625	534	854.4
			Second born, one earlier daughter	1592	1399	878.769	2428	2341	964.168	478	430	899.582	247	253	1024.29	850	834	981.176	185	205	1108.11	521	552	1059.5
			Third born, two earlier sons	120	107	891.667	173	153	884.393	49	49		73	65	890.411	100	114	1140	22	18		55	44
			Third born, two earlier daughters	167	127	760.479	241	212	879.668	49	53	1081.63	68	63	926.471	122	86	704.918	28	22		49	61	1244.9
			Third born, one earlier son and daughter	189	208	1100.53	287	260	905.923	62	81	1306.45	127	137	1078.74	127	147	1157.48	37	32		69	65	942.029
			All births	8034	7680	955.937	14305	13476	942.048	2647	2584	976.199	1573	1482	942.149	4628	4447	960.89	1064	1015	953.947	3434	3188	928.363
	Australia	Mother's country of birth			Australia
	2006		First born	994	973	978.873	2713	2611	962.403	13	20		65	63	969.231	457	428	936.543	6	0
			Second born, one earlier son	295	283	959.322	830	759	914.458	6	3		17	15		123	146	1186.99	4	0
			Second born, one earlier daughter	300	266	886.667	779	783	1005.13	3	3		21	19		137	126	919.708	0	0
			Third born, two earlier sons	59	48	813.559	123	121	983.74	0	0		0	3		19	15		0	0
			Third born, two earlier daughters	30	33		145	105	724.138	0	0		3	0		16	13		0	0
			Third born, one earlier son and daughter	64	71	1109.38	199	194	974.874	0	0		8	0		38	37		0	0
			All births	1782	1706	957.351	4857	4667	960.881	31	37		125	113	904	788	766	972.081	12	13
		Mother's country of birth			India			China			Korea			Pakistan			Sri Lanka			Bangladesh			Hong Kong
			First born	10654	10220	959.264	11685	10943	936.5	2592	2493	961.806	1363	1330	975.789	3119	2910	932.991	1454	1395	959.422	2182	2134	978.002
			Second born, one earlier son	2920	2739	938.014	3034	2790	919.578	786	753	958.015	585	528	902.564	1076	1048	973.978	412	381	924.757	567	533	940.035
			Second born, one earlier daughter	3061	2680	875.531	2904	2731	940.427	764	727	951.571	551	493	894.737	953	936	982.162	389	385	989.717	536	520	970.149
			Third born, two earlier sons	171	140	818.713	198	155	782.828	97	97	1000	129	121	937.984	123	145	1178.86	51	38		42	40
			Third born, two earlier daughters	261	201	770.115	282	252	893.617	86	88	1023.26	130	115	884.615	113	109	964.602	48	36		53	53	1000
			Third born, one earlier son and daughter	309	257	831.715	297	258	868.687	150	157	1046.67	249	256	1028.11	163	181	1110.43	69	56	811.594	50	69	1380
			All births	17458	16305	933.956	18490	17210	930.773	4492	4358	970.169	3125	2953	944.96	5588	5381	962.956	2442	2308	945.127	3458	3377	976.576
	Australia	Mother's country of birth			Australia
	2011		First born	1373	1364	993.445	3569	3441	964.136	54	48	888.889	89	98	1101.12	581	569	979.346	13	17
			Second born, one earlier son	397	404	1017.63	1074	1034	962.756	8	16		15	33		192	197	1026.04	8	0
			Second born, one earlier daughter	418	401	959.33	1041	993	953.89	11	10		31	37		176	164	931.818	3	3
			Third born, two earlier sons	68	62	911.765	163	153	938.65	0	0		3	3		32	23		0	0
			Third born, two earlier daughters	51	63	1235.29	137	141	1029.2	0	0		6	7		29	25		0	0
			Third born, one earlier son and daughter	106	104	981.132	311	233	749.196	6	0		10	11		47	56	1191.49	0	4
			All births	2440	2446	1002.46	6378	6097	955.942	68	86	1264.71	176	206	1170.45	1072	1036	966.418	33	33
		Mother's country of birth			India			China			Korea			Pakistan			Sri Lanka			Bangladesh			Hong Kong
			First born	24397	23180	950.117	20075	18959	944.408	4061	3920	965.279	2574	2445	949.883	4266	4126	967.182	2862	2638	921.733	2858	2596	908.328
			Second born, one earlier son	6860	6490	946.064	5357	4942	922.531	1286	1220	948.678	1059	1043	984.891	1474	1480	1004.07	872	818	938.073	775	733	945.806
			Second born, one earlier daughter	7419	6590	888.26	5271	4664	884.842	1180	1135	961.864	1053	994	943.97	1422	1432	1007.03	835	794	950.898	710	724	1019.72
			Third born, two earlier sons	318	330	1037.74	334	350	1047.9	155	165	1064.52	223	217	973.094	170	170	1000	65	66	1015.38	61	57	934.426
			Third born, two earlier daughters	596	389	652.685	421	334	793.349	147	128	870.748	230	241	1047.83	169	153	905.325	84	70	833.333	66	51	772.727
			Third born, one earlier son and daughter	578	566	979.239	537	462	860.335	230	234	1017.39	484	433	894.628	245	259	1057.14	136	124	911.765	80	90	1125
			All births	40291	37630	933.955	32116	29803	927.98	7099	6858	966.052	5808	5551	955.751	7789	7666	984.208	4853	4519	931.177	4561	4271	936.417
	Australia	Mother's country of birth			Australia
	2016		First born	1911	1710	894.819	4993	4591	919.487	134	124	925.373	162	139	858.025	755	655	867.55	32	23
			Second born, one earlier son	600	601	1001.67	1513	1434	947.786	20	39		47	42	893.617	242	229	946.281	6	3
			Second born, one earlier daughter	538	530	985.13	1403	1364	972.202	27	36		34	53		215	197	916.279	3	3
			Third born, two earlier sons	86	91	1058.14	213	213	1000	3	3		7	9		45	42		0	0
			Third born, two earlier daughters	66	80	1212.12	202	176	871.287	9	0		3	8		30	33		0	0
			Third born, one earlier son and daughter	120	128	1066.67	330	281	851.515	10	5		18	5		65	51	784.615	0	3
			All births	3365	3166	940.862	8751	8157	932.122	210	213	1014.29	277	264	953.069	1348	1238	918.398	50	37	740

## Sheet: Supplementary file 1B
			Births and CSRs from Canada Census 2001, 2016
			Mother's ethnicity/ancestry		Indian			Chinese			Korean			Pakistani			Sri Lankan			Bangladeshi		Hong Kong (Chinese)
	Country (Year)		Birth order and sex of previous child	Male	Female	Sex Ratio	Male	Female	Sex Ratio	Male	Female	Sex Ratio	Male	Female	Sex Ratio	Male	Female	Sex Ratio	Male	Female	Sex Ratio	Male	Female	Sex Ratio
		Mother's country of birth			India			China			Korea			Pakistan			Sri Lanka			Bangladesh			Hong Kong
			First born	1801	1677	931.149	1858	1733	932.723
			Second born, one earlier son	590	620	1050.85	493	431	874.239
			Second born, one earlier daughter	618	531	859.223	451	463	1026.61
			Third born, two earlier sons	66	62	939.394	54	42
			Third born, two earlier daughters	137	74	540.146	62	56	903.226
			Third born, one earlier son and daughter
	Canada		All births	3470	3169	913.256	3060	2871	938.235
	2001	Mother's country of birth			Canada
			First born
			Second born, one earlier son
			Second born, one earlier daughter
			Third born, two earlier sons
			Third born, two earlier daughters
			Third born, one earlier son and daughter
			All births
		Mother's country of birth			India			China			Korea			Pakistan			Sri Lanka			Bangladesh			Hong Kong
			First born	36090	34720	962.039	32465	29765	916.834	4905	4585	934.76	10710	10615	991.13	8000	8030	1003.75	3470	3415	984.15	5645	5540	981.399
			Second born, one earlier son	11845	11255	950.19	9015	8575	951.192	1470	1315	894.558	4240	3975	937.5	2850	2925	1026.32	1100	1005	913.636	1600	1345	840.625
			Second born, one earlier daughter	12275	10825	881.874	8370	7855	938.471	1340	1235	921.642	4110	4080	992.701	3015	2640	875.622	1130	1100	973.451	1540	1315	853.896
			Third born, two earlier sons	660	645	977.273	540	580	1074.07	145	145	1000	1025	990	965.854	560	490	875	105	150	1428.57	105	140	1333.33
			Third born, two earlier daughters	2085	1085	520.384	810	710	876.543	120	120	1000	1080	1080	1000	385	390	1012.99	170	135	794.118	110	90	818.182
			Third born, one earlier son and daughter	1555	1415	909.968	920	890	967.391	220	265	1204.55	2010	1935	962.687	805	820	1018.63	305	195	639.344	125	160	1280
			All births	64980	60285	927.747	52375	48600	927.924	8255	7715	934.585	24125	23495	973.886	15740	15450	981.576	6345	6060	955.083	9145	8605	940.951
	Canada	Mother's country of birth			Canada
	2016		First born	8535	8265	968.366	9140	8785	961.16	790	705	892.405	735	655	891.156	220	195	886.364	35	25
			Second born, one earlier son	2420	2610	1078.51	2720	2420	889.706	225	260	1155.56	210	230	1095.24	55	75	1363.64	15	0
			Second born, one earlier daughter	2565	2380	927.875	2320	2395	1032.33	260	155	596.154	245	195	795.918	20	60		10	0
			Third born, two earlier sons	240	310	1291.67	265	295	1113.21	20	30		15	45		0	10		10	0
			Third born, two earlier daughters	330	255	772.727	240	260	1083.33	20	25		55	25		10	10		0	0
			Third born, one earlier son and daughter	460	495	1076.09	375	330	880	30	25		90	90	1000	20	0		0	0
			All births	14680	14455	984.673	15175	14580	960.791	1355	1200	885.609	1385	1260	909.747	350	375	1071.43	60	35
		Mother's country of birth			India			China			Korea			Pakistan			Sri Lanka			Bangladesh			Hong Kong
			First born	19165	18180	948.604	16640	15275	917.969	2105	2005	952.494	7310	7385	1010.26	6575	6730	1023.57	2210	2070	936.652	2995	2850	951.586
			Second born, one earlier son	6470	5940	918.083	4795	4405	918.665	685	575	839.416	2810	2760	982.206	2265	2465	1088.3	735	630	857.143	890	705	792.135
			Second born, one earlier daughter	6540	5690	870.031	4465	3960	886.898	630	540	857.143	2855	2900	1015.76	2545	2190	860.511	705	620	879.433	755	695	920.53
			Third born, two earlier sons	380	370	973.684	275	325	1181.82	40	90	2250	640	640	1000	460	380	826.087	80	110	1375	80	70	875
			Third born, two earlier daughters	1000	515	515	445	410	921.348	70	20	285.714	765	740	967.32	325	320	984.615	65	80	1230.77	35	45
			Third born, one earlier son and daughter	850	780	917.647	545	475	871.56	125	105	840	1435	1205	839.721	665	715	1075.19	155	120	774.194	65	85	1307.69
			All births	34675	31690	913.915	27315	25005	915.431	3685	3360	911.805	16430	16155	983.262	12910	12930	1001.55	3995	3680	921.151	4830	4460	923.395
	Canada	Mother's country of birth			Canada
	Ontario		First born	4345	4210	968.93	3965	3875	977.301	525	465	885.714	470	415	882.979	150	125	833.333	10	10
	2016		Second born, one earlier son	1270	1330	1047.24	1165	1000	858.369	165	160	969.697	135	165	1222.22	35	60		10	0
			Second born, one earlier daughter	1305	1185	908.046	1015	1100	1083.74	160	105	656.25	145	130	896.552	20	35		0	10
			Third born, two earlier sons	155	180	1161.29	115	125	1086.96	15	25		10	25		0	10		0	0
			Third born, two earlier daughters	135	130	962.963	120	105	875	15	15		30	15		10	0		0	0
			Third born, one earlier son and daughter	270	265	981.481	180	140	777.778	20	20		65	45	692.308	20	20		0	0
			All births	7575	7420	979.538	6600	6415	971.97	900	800	888.889	890	805	904.494	220	255	1159.09	30	20
		Mother's country of birth			India			China			Korea			Pakistan			Sri Lanka			Bangladesh			Hong Kong
			First born	8665	8295	957.299	8165	7725	946.111	1690	1535	908.284	520	455	875	225	180	800	115	110	956.522	1935	1890	976.744
			Second born, one earlier son	2910	2855	981.1	2095	2060	983.294	460	455	989.13	240	170	708.333	120	60	500	20	30		540	465	861.111
			Second born, one earlier daughter	3095	2550	823.91	2050	2055	1002.44	400	440	1100	170	160	941.176	75	60	800	20	50		530	395	745.283
			Third born, two earlier sons	190	170	894.737	130	120	923.077	45	25		75	50	666.667	20	10		0	0		15	35
			Third born, two earlier daughters	600	330	550	225	180	800	30	65		65	30		10	10		0	0		55	30
			Third born, one earlier son and daughter	375	350	933.333	185	155	837.838	55	85	1545.45	70	60	857.143	25	10		0	0		45	45	1000
			All births	15950	14640	917.868	12895	12320	955.409	2695	2615	970.315	1195	950	794.979	470	315	670.213	165	190	1151.52	3120	2865	918.269
	Canada_BC	Mother's country of birth			Canada
	British Columbia		First born	2705	2710	1001.85	2770	2770	1000	10	0		55	65	1181.82	160	125	781.25	25	25
	2016		Second born, one earlier son	740	795	1074.32	830	775	933.735	10	0		25	20		30	50	1666.67	10	0
			Second born, one earlier daughter	855	800	935.673	745	700	939.597	0	0		30	20		65	20	307.692	10	15
			Third born, two earlier sons	70	80	1142.86	70	75	1071.43	0	0		0	10		0	0		0	0
			Third born, two earlier daughters	115	75	652.174	65	115	1769.23	0	0		0	0		0	0		0	0
			Third born, one earlier son and daughter	100	130	1300	100	95	950	0	0		20	0		10	0		0	0
			All births	4610	4605	998.915	4615	4555	986.999	10	0		135	110	814.815	260	200	769.231	40	40

## Sheet: Supplementary file 1C
			Births and CSRs from UK Census 2001, 2011
			Mother's ethnicity/ancestry		Indian			Chinese			Korean			Pakistani			Sri Lankan			Bangladeshi		Hong Kong (Chinese)
	Country (Year)		Birth order and sex of previous child	Male	Female	Sex Ratio	Male	Female	Sex Ratio	Male	Female	Sex Ratio	Male	Female	Sex Ratio	Male	Female	Sex Ratio	Male	Female	Sex Ratio	Male	Female	Sex Ratio
		Mother's country of birth			India			China			Korea			Pakistan			Sri Lanka			Bangladesh			Hong Kong
			First born	19335	18348	948.953	1554	1415	910.553				17803	16444	923.665	2765	2606	942.495	9475	8926	942.058	3417	3292	963.418
			Second born, one earlier son	5762	5711	991.149	452	458	1013.27				6393	6308	986.704	853	811	950.762	3728	3550	952.253	1051	1083	1030.45
			Second born, one earlier daughter	6049	5515	911.721	465	424	911.828				6188	5762	931.157	800	813	1016.25	3616	3535	977.6	1060	1029	970.755
			Third born, two earlier sons	681	656	963.289	51	44					1765	1760	997.167	108	95	879.63	1038	974	938.343	132	129	977.273
			Third born, two earlier daughters	1192	1009	846.477	60	47	783.333				1805	1636	906.371	111	101	909.91	1115	953	854.709	202	186	920.792
			Third born, one earlier son and daughter	1517	1365	899.802	82	77	939.024				3547	3189	899.07	136	132	970.588	1974	1817	920.466	213	205	962.441
	UK		All births	34536	32604	944.058	2664	2465	925.3				37501	35099	935.948	4773	4558	954.955	20946	19755	943.14	6075	5924	975.144
	2001	Mother's country of birth			UK
			First born	12432	11816	950.45	707	777	1099.01				8680	8525	982.143	141	139	985.816	1536	1478	962.24
			Second born, one earlier son	3937	3830	972.822	165	205	1242.42				2830	2761	975.618	44	34		462	491	1062.77
			Second born, one earlier daughter	3846	3693	960.218	201	168	835.821				2892	2706	935.685	37	48		473	464	980.973
			Third born, two earlier sons	528	509	964.015	22	20					632	669	1058.54	4	7		105	89	847.619
			Third born, two earlier daughters	775	657	847.742	22	15					685	651	950.365	5	6		126	99	785.714
			Third born, one earlier son and daughter	1022	991	969.667	41	33					1389	1181	850.252	8	7		216	192	888.889
			All births	22540	21496	953.682	1158	1218	1051.81				17108	16493	964.052	239	241	1008.37	2918	2813	964.016
		Mother's country of birth			India			China			Korea			Pakistan			Sri Lanka			Bangladesh			Hong Kong
			First born	25377	24067	948.378	5832	5483	940.158	657	611	929.985	24607	22903	930.751	7183	7087	986.635	13763	12973	942.6	2830	2774	980.212
			Second born, one earlier son	8282	7878	951.22	1428	1353	947.479	171	162	947.368	10003	9617	961.412	2657	2581	971.396	5770	5483	950.26	747	773	1034.81
			Second born, one earlier daughter	8378	7730	922.655	1366	1263	924.597	157	162	1031.85	9348	9025	965.447	2572	2514	977.449	5475	5241	957.26	760	704	926.316
			Third born, two earlier sons	711	746	1049.23	119	85	714.286	22	22		2840	2601	915.845	470	454	965.957	1554	1487	956.885	90	65	722.222
			Third born, two earlier daughters	1280	996	778.125	179	173	966.48	13	16		2802	2799	998.929	411	418	1017.03	1584	1481	934.975	83	86	1036.14
			Third born, one earlier son and daughter	1458	1371	940.329	184	161	875	40	43		5230	5135	981.836	657	662	1007.61	2861	2726	952.814	115	127	1104.35
			All births	45486	42788	940.685	9108	8518	935.222	1060	1016	958.491	54830	52080	949.845	13950	13716	983.226	31007	29391	947.883	4625	4529	979.243
	UK	Mother's country of birth			UK
	2011		First born	19786	19097	965.177	2228	1951	875.673	11	11		19494	18444	946.137	409	386	943.765	4552	4422	971.441
			Second born, one earlier son	6102	5965	977.548	521	521	1000	2	1		6943	6852	986.893	132	110	833.333	1430	1348	942.657
			Second born, one earlier daughter	6042	5690	941.741	514	475	924.125	1	2		6590	6455	979.514	101	106	1049.5	1368	1329	971.491
			Third born, two earlier sons	757	675	891.678	52	49	942.308	0	0		1684	1602	951.306	17	13		289	286	989.619
			Third born, two earlier daughters	965	892	924.352	49	57	1163.27	1	1		1760	1647	935.795	14	11		297	310	1043.77
			Third born, one earlier son and daughter	1337	1254	937.921	98	59	602.041	0	0		3275	3160	964.885	22	20		531	497	935.97
			All births	34989	33573	959.53	3462	3112	898.902	15	15		39746	38160	960.097	695	646	929.496	8467	8192	967.521

## Sheet: Supplementary file 1D
			Births and CSRs from USA Census and ACS
			Mother's ethnicity/ancestry		Indian			Chinese			Korean			Pakistani			Sri Lankan			Bangladeshi		Hong Kong (Chinese)
	Country (Year)		Birth order and sex of previous child	Male	Female	Sex Ratio	Male	Female	Sex Ratio	Male	Female	Sex Ratio	Male	Female	Sex Ratio	Male	Female	Sex Ratio	Male	Female	Sex Ratio	Male	Female	Sex Ratio
		Mother's country of birth			India			China			Korea			Pakistan			Sri Lanka			Bangladesh			Hong Kong
			First born	2315	2258	975.378	1854	1761	949.838	2017	1862	923.153	431	458	1062.65	49	58	1183.67	158	137	867.089	508	463	911.417
			Second born, one earlier son	859	855	995.343	681	647	950.073	816	804	985.294	201	204	1014.93	17	14		61	50	819.672	188	195	1037.23
			Second born, one earlier daughter	930	815	876.344	710	553	778.873	809	737	911.001	222	204	918.919	23	22		59	57	966.102	204	168	823.529
			Third born, two earlier sons	75	81	1080	53	61	1150.94	105	88	838.095	57	44	771.93	3	3		10	11		29	27
			Third born, two earlier daughters	182	100	549.451	109	83	761.468	149	118	791.946	68	69	1014.71	3	7		11	9		30	21
			Third born, one earlier son and daughter	156	149	955.128	119	109	915.966	127	157	1236.22	114	101	885.965	4	1		25	24		23	42
	USA		All births	4604	4314	937.011	3596	3280	912.125	4090	3819	933.741	1199	1183	986.656	103	105	1019.42	345	308	892.754	1000	934	934
	2000	Mother's country of birth			USA
			First born	143	125	874.126	625	604	966.4	195	191	979.487	13	13		0	0		1	1
			Second born, one earlier son	45	37		231	201	870.13	52	44		6	3		0	0		0	1
			Second born, one earlier daughter	42	35		208	190	913.462	52	43		5	3		0	2		0	0
			Third born, two earlier sons	6	8		32	33		10	4		1	0		0	0		0	0
			Third born, two earlier daughters	10	5		30	25		5	8		1	1		1	0		0	0
			Third born, one earlier son and daughter	16	11		59	61	1033.9	10	8		0	1		0	0		0	0
			All births	272	232	852.941	1220	1150	942.623	333	305	915.916	27	21		1	2		1	2
		Mother's country of birth			India			China			Korea			Pakistan			Sri Lanka			Bangladesh			Hong Kong
			First born	1050	1050	1000	772	760	984.456	728	687	943.681	185	154	832.432	17	18		68	52	764.706	231	180	779.221
			Second born, one earlier son	414	381	920.29	300	278	926.667	311	271	871.383	91	84	923.077	7	9		29	36		95	96	1010.53
			Second born, one earlier daughter	398	362	909.548	292	274	938.356	291	298	1024.05	84	72	857.143	12	9		23	23		77	72	935.065
			Third born, two earlier sons	32	36		24	21		31	42		18	26		2	1		3	9		18	15
			Third born, two earlier daughters	68	42	617.647	42	42		38	53		26	23		2	2		6	4		11	6
			Third born, one earlier son and daughter	59	50	847.458	37	31		58	41	706.897	37	53		1	2		12	10		15	17
			All births	2055	1941	944.526	1493	1425	954.454	1481	1412	953.41	483	448	927.536	41	42		149	147	986.577	449	391	870.824
	USA	Mother's country of birth			USA
	2004		First born	48	51	1062.5	320	300	937.5	82	88	943.681	10	10	832.432	1	1		2	0
			Second born, one earlier son	14	20		111	118	1063.06	29	17		5	0	923.077	0	0		0	2
			Second born, one earlier daughter	8	18		106	88	830.189	29	23		3	0	857.143	0	0		0	0
			Third born, two earlier sons	3	3		20	17		4	5		0	1		0	0		0	0
			Third born, two earlier daughters	1	2		15	11		3	4		0	1		0	0		0	0
			Third born, one earlier son and daughter	5	3		30	31		2	9		0	1		0	0		0	0
			All births	81	101	1246.91	619	583	941.842	154	148	953.41	18	14	927.536	1	1		2	2
		Mother's country of birth			India			China			Korea			Pakistan			Sri Lanka			Bangladesh			Hong Kong
			First born	4344	4231	973.987	2976	2862	961.694	2314	2072	895.419	591	624	1055.84	99	85	858.586	301	305	1013.29	572	538	940.559
			Second born, one earlier son	1588	1595	1004.41	1170	1082	924.786	979	850	868.233	289	287	993.08	34	30		154	158	1025.97	231	198	857.143
			Second born, one earlier daughter	1613	1521	942.963	1105	1094	990.045	863	801	928.158	314	287	914.013	32	41		157	134	853.503	205	195	951.22
			Third born, two earlier sons	94	116	1234.04	91	98	1076.92	129	128	992.248	77	91	1181.82	10	2		31	27		27	33
			Third born, two earlier daughters	244	139	569.672	173	135	780.347	132	122	924.242	98	82	836.735	6	6		38	27		25	21
			Third born, one earlier son and daughter	231	196	848.485	141	120	851.064	205	169	824.39	174	160	919.54	3	3		59	55	932.203	34	40
			All births	8195	7846	957.413	5720	5443	951.573	4686	4205	897.354	1706	1663	974.795	184	173	940.217	777	737	948.52	1110	1039	936.036
	USA	Mother's country of birth			USA
	2009		First born	232	233	1004.31	886	885	998.871	368	380	1032.61	42	46	1095.24	3	6		0	7
			Second born, one earlier son	67	76	1134.33	347	290	835.735	131	117	893.13	11	10		0	2		0	0
			Second born, one earlier daughter	81	72	888.889	312	299	958.333	93	113	1215.05	12	13		2	2		2	2
			Third born, two earlier sons	10	5		49	64	1306.12	14	16		1	2		0	0		0	0
			Third born, two earlier daughters	13	8		48	34		17	14		1	3		0	0		0	0
			Third born, one earlier son and daughter	15	16		63	81	1285.71	34	22		5	8		0	0		0	0
			All births	424	422	995.283	1742	1683	966.131	674	672	997.033	74	87	1175.68	5	10		2	9
		Mother's country of birth			India			China			Korea			Pakistan			Sri Lanka			Bangladesh			Hong Kong
			First born	5238	5092	972.127	3706	3389	914.463	2250	1985	882.222	673	603	895.988	90	95	1055.56	399	389	974.937	518	506	976.834
			Second born, one earlier son	1880	1963	1044.15	1469	1306	889.04	853	837	981.243	311	311	1000	29	38		214	213	995.327	182	178	978.022
			Second born, one earlier daughter	1997	1947	974.962	1374	1250	909.753	818	738	902.2	317	286	902.208	40	44		209	205	980.861	195	162	830.769
			Third born, two earlier sons	108	118	1092.59	117	126	1076.92	119	121	1016.81	106	78	735.849	1	5		45	30		29	22
			Third born, two earlier daughters	274	163	594.891	212	156	735.849	111	105	945.946	99	104	1050.51	10	5		46	41		20	19
			Third born, one earlier son and daughter	220	195	886.364	190	183	963.158	193	184	953.368	192	186	968.75	14	7		79	72	911.392	29	33
			All births	9811	9564	974.824	7153	6477	905.494	4456	4048	908.438	1851	1738	938.952	186	203	1091.4	1056	1018	964.015	988	933	944.332
	USA	Mother's country of birth			USA
	2014		First born	476	409	859.244	1104	978	885.87	461	496	1075.92	83	71	855.422	8	6		5	6
			Second born, one earlier son	147	155	1054.42	410	355	865.854	162	143	882.716	31	25		2	3		2	3
			Second born, one earlier daughter	120	149	1241.67	377	312	827.586	152	143	940.789	21	28		2	1		0	1
			Third born, two earlier sons	10	17		65	66	1015.38	34	26		5	7		0	0		1	3
			Third born, two earlier daughters	21	19		44	41		19	22		8	6		0	0		0	0
			Third born, one earlier son and daughter	16	28		89	83	932.584	37	53		10	5		0	1		0	0
			All births	807	787	975.217	2126	1873	880.997	900	916	1017.78	166	148	891.566	12	11		9	14
		Mother's country of birth			India			China			Korea			Pakistan			Sri Lanka			Bangladesh			Hong Kong
			First born	6471	6285	971.256	4455	4167	935.354	2312	2052	887.543	752	682	906.915	99	105	1060.61	482	456	946.058	516	443	858.527
			Second born, one earlier son	2483	2386	960.934	1801	1569	871.183	867	842	971.165	379	349	920.844	38	35		263	219	832.7	186	178	956.989
			Second born, one earlier daughter	2650	2381	898.491	1640	1524	929.268	796	722	907.035	332	321	966.867	47	45		245	244	995.918	166	168	1012.05
			Third born, two earlier sons	152	120	789.474	158	126	797.468	135	111	822.222	121	107	884.298	3	9		56	42		26	17
			Third born, two earlier daughters	210	169	804.762	238	186	781.513	133	106	796.992	107	91	850.467	3	3		51	67	1313.73	26	20
			Third born, one earlier son and daughter	225	183	813.333	228	215	942.982	195	174	892.308	196	178	908.163	3	6		71	88	1239.44	38	23
			All births	12293	11619	945.172	8613	7870	913.735	4522	4088	904.025	2082	1902	913.545	194	204	1051.55	1221	1152	943.489	977	856	876.151
	USA	Mother's country of birth			USA
	2019		First born	720	629	873.611	1267	1214	958.169	679	601	885.125	111	106	954.955	10	11		20	15
			Second born, one earlier son	242	255	1053.72	461	429	930.586	220	221	1004.55	37	40		6	5		5	3
			Second born, one earlier daughter	229	214	934.498	453	399	880.795	207	194	937.198	29	32		3	6		3	3
			Third born, two earlier sons	18	27		71	58	816.901	38	26		9	5		0	1		1	1
			Third born, two earlier daughters	30	23		49	42		29	24		5	7		4	1		1	1
			Third born, one earlier son and daughter	55	45	818.182	103	103	1000	43	50		9	10		2	2		0	0
			All births	1307	1213	928.08	2449	2281	931.401	1233	1130	916.464	203	207	1019.7	25	28		31	25

## Sheet: Supplementary file 1E
			Births and CSRs for domestic population
	Mother's Country of birth/Mother's ancestry		Birth order and sex of previous child	Male	Female	Sex Ratio	Male	Female	Sex Ratio	Male	Female	Sex Ratio	Male	Female	Sex Ratio	Male	Female	Sex Ratio
		Year			2001			2006			2011			2016
			First born	252457	241195	955.39	269928	257901	955.444	254316	242680	954.246	247681	235301	950.016
			Second born, one earlier son	84000	80388	957	88740	84570	953.009	84018	79700	948.606	83143	78637	945.804
			Second born, one earlier daughter	79257	76575	966.161	84558	79712	942.69	79723	75858	951.52	77959	74764	959.017
	Australia/Australian		Third born, two earlier sons	15935	14928	936.806	15940	14741	924.78	15041	14147	940.562	14567	13649	936.981
			Third born, two earlier daughters	13796	13029	944.404	13500	12705	941.111	12816	12235	954.666	12325	11777	955.538
			Third born, one earlier son and daughter	23446	22115	943.231	23447	22134	944.001	22411	21243	947.883	21544	20835	967.091
			All births	478668	457820	956.446	505756	480840	950.735	477560	454565	951.849	465881	443143	951.194
		Year			2001									2016
			First born	41303	39346	952.618							369270	353420	957.077
			Second born, one earlier son	13038	12710	974.843							113475	108010	951.84
			Second born, one earlier daughter	12584	11757	934.282							107180	100990	942.247
	Canada/Canadian		Third born, two earlier sons	2058	2063	1002.43							15525	15140	975.201
			Third born, two earlier daughters	1919	1794	934.862							13385	12640	944.341
			Third born, one earlier son and daughter										23915	22895	957.349
			All births	76504	73008	954.303							651740	621570	953.709
		Year			2001						2011
			First born	1423165	1351341	949.532				1539058	1470117	955.206
			Second born, one earlier son	443864	424062	955.387				439037	418698	953.674
			Second born, one earlier daughter	417605	398722	954.783				415225	394306	949.62
	UK/British		Third born, two earlier sons	66036	62149	941.138				59722	56778	950.705
			Third born, two earlier daughters	54990	52288	950.864				49821	48118	965.818
			Third born, one earlier son and daughter	94284	89570	950.002				88924	84446	949.642
			All births	2499944	2378132	951.274				2591787	2472463	953.961
		Year			2000			2004			2009			2014			2019
			First born	9835	9316	947.229	6914	6598	954.296	21264	19951	938.252	25675	24093	938.384	21279	20216	950.045
			Second born, one earlier son	3686	3440	933.261	2615	2495	954.111	8249	7751	939.629	10308	9499	921.517	8437	7922	938.959
			Second born, one earlier daughter	3385	3333	984.638	2429	2387	982.709	7635	7235	947.61	9457	8858	936.661	7876	7670	973.845
	USA/White		Third born, two earlier sons	746	694	930.295	501	454	906.188	1642	1503	915.347	2128	1999	939.38	1796	1691	941.537
			Third born, two earlier daughters	659	680	1031.87	446	428	959.641	1403	1317	938.703	1777	1748	983.68	1599	1550	969.356
			Third born, one earlier son and daughter	1122	1103	983.066	789	749	949.303	2462	2319	941.917	3351	3020	901.224	2848	2668	936.798
			All births	20264	19372	955.981	14148	13515	955.259	44345	41630	938.776	55140	51649	936.688	46305	44032	950.912
		Year			1999			2006						2016
			First born	23246	21661	931.816	24664	23635	958.279				129565	120668	931.332
			Second born, one earlier son	10514	10016	952.635	11025	10736	973.787				53721	52991	986.411
			Second born, one earlier daughter	10204	9211	902.685	11518	9941	863.084				56091	48602	866.485
	India/Indian		Third born, two earlier sons	3620	3521	972.652	3442	3339	970.076				12039	11965	993.853
			Third born, two earlier daughters	4072	3585	880.403	4411	3669	831.784				19848	15263	768.994
			Third born, one earlier son and daughter	7420	6977	940.296	7559	6839	904.749				28009	25049	894.32
			All births	83724	77799	929.232	86616	80245	926.445				361918	331309	915.426
		Year			2000			2006			2011			2015
			First born	905	782	864.088	706	619	876.771	800	761	951.25	716	648	905.028
			Second born, one earlier son	188	214	1138.3	93	102	1096.77	88	118	1340.91	123	142	1154.47
			Second born, one earlier daughter	279	189	677.419	220	81	368.182	232	112	482.759	239	134	560.669
	China/Chinese		Third born, two earlier sons	17	42		8	8		4	4		5	2
			Third born, two earlier daughters	70	40		28	8		28	6		38	10
			Third born, one earlier son and daughter	61	44		19	10		14	8		13	9
			All births	1589	1355	852.738	1091	842	771.769	1175	1018	866.383	1142	951	832.75
